1 **Genomic and phenotypic comparison of environmental and patient-derived isolates of**  
2 ***Pseudomonas aeruginosa* suggest that antimicrobial resistance is rare within the**  
3 **environment**

4 Kay A Ramsay<sup>1\*</sup>, Samuel J T Wardell<sup>1</sup>, Wayne M Patrick<sup>2</sup>, Ben Brockway<sup>3</sup>, David W Reid<sup>4,5</sup>,  
5 Craig Winstanley<sup>6</sup>, Scott C Bell<sup>4,5,7</sup>, Iain L Lamont<sup>1\*</sup>

6 <sup>1</sup>Department of Biochemistry, University of Otago, Dunedin, New Zealand

7 <sup>2</sup>School of Biological Sciences, Victoria University of Wellington, Wellington, New Zealand

8 <sup>3</sup>Department of Medicine, University of Otago, Dunedin, New Zealand.

9 <sup>6</sup>Institute of Infection and Global Health, University of Liverpool, Liverpool, United Kingdom

10 <sup>4</sup>Lung Bacteria Group, QIMR Berghofer Medical Research Institute, Brisbane, Australia

11 <sup>5</sup>Department of Thoracic Medicine, The Prince Charles Hospital, Brisbane, Australia

12 <sup>7</sup>Faculty of Medicine, The University of Queensland, Brisbane, Australia

13

14 **Short Running Title:** Antibiotic susceptibility of *Pseudomonas aeruginosa*

15

16 **Key Words:** *Pseudomonas aeruginosa*, environmental, antibiotic resistance, genetic variant,  
17 cystic fibrosis

18

19 **\*Corresponding Authors**

20 Kay A Ramsay

21 Phone: +64 479 7847

22 Email: [kay.ramsay@otago.ac.nz](mailto:kay.ramsay@otago.ac.nz)

23 Iain L Lamont

24 Phone: +64 3 479 7864

25 Email: [iain.lamont@otago.ac.nz](mailto:iain.lamont@otago.ac.nz)

26 **Orcid Id**

27 Kay A Ramsay: 0000-0002-6682-9351

28 Samuel J T Wardell: NA

29 Wayne M Patrick: 0000-0002-2718-8053

30 Ben Brockway: NA

31 David W Reid: NA

32 Craig Winstanley: 0000-0002-2662-8053

33 Scott C Bell: 0000-0001-8651-7139

34 Iain L Lamont: 0000-0002-7601-6354

35

36 **Author Contributions**

| <b>Contribution</b>                  | <b>Author</b>                         |
|--------------------------------------|---------------------------------------|
| Conceptualisation                    | ILL, WMP, CW, SCB                     |
| Methodology                          | ILL, KAR                              |
| Software                             | SJTW                                  |
| Validation                           | KAR                                   |
| Formal Analysis                      | KAR, SJTW                             |
| Investigation                        | KAR, SJTW                             |
| Resources                            | ILL                                   |
| Data Curation                        | KAR                                   |
| Writing – Original draft preparation | KAR                                   |
| Writing – Review and editing         | KAR, SJTW, WMP, BB, DWR, CW, SCB, ILL |
| Supervision                          | ILL                                   |
| Funding                              | ILL, WMP, CW, SCB                     |

37

## 38 **Abstract**

39 Patient-derived isolates of the opportunistic pathogen *Pseudomonas aeruginosa* are frequently  
40 resistant to antibiotics due to the presence of sequence variants in resistance-associated genes.  
41 However, the frequency of antibiotic resistance and of resistance-associated sequence variants  
42 in environmental isolates of *P. aeruginosa* has not been well studied. Antimicrobial  
43 susceptibility testing (ciprofloxacin, ceftazidime, meropenem, tobramycin) of environmental  
44 (n=50) and cystic fibrosis (n=42) *P. aeruginosa* isolates was carried out. Following whole  
45 genome sequencing of all isolates, twenty-five resistance-associated genes were analysed for  
46 the presence of likely function-altering sequence variants. Environmental isolates were  
47 susceptible to all antibiotics with one exception, whereas patient-derived isolates had  
48 significant frequencies of resistance to each antibiotic and a greater number of likely resistance-  
49 associated genetic variants. These findings indicate that the natural environment does not act  
50 as a reservoir of antibiotic-resistant *P. aeruginosa*, supporting a model in which antibiotic  
51 susceptible environmental bacteria infect patients and develop resistance during infection.

52

## 53 **Introduction**

54 As an environmental bacterium, *Pseudomonas aeruginosa* has been isolated from many  
55 different niches including water sources and domestic and health-care settings (1-4). While  
56 rarely causing infections in healthy individuals, this opportunistic pathogen can cause a range  
57 of infections in people who are immunocompromised or have predisposing conditions such as  
58 cystic fibrosis (CF) (1). For adults with CF, *P. aeruginosa* is the most prevalent bacterium  
59 causing respiratory infection and *P. aeruginosa* from these infections are frequently resistant  
60 to antibiotics, complicating treatment (5). Resistance is associated with variants in key genes  
61 that reduce the intracellular concentrations of antibiotics or the affinities of target proteins for  
62 antibiotics, relative to antibiotic-susceptible isolates (6). Infection arises from exposure to

63 environmental sources of *P. aeruginosa* included both the natural and health-care environment  
64 (1). Epidemiological studies of isolates obtained from high infection risk areas, such as health-  
65 care settings, domestic and community areas show that antibiotic resistant *P. aeruginosa* can  
66 be present providing a potential reservoir of infectious resistant bacteria (7-18). Acquisition of  
67 *P. aeruginosa* from the natural environment, typically during childhood, is also a major source  
68 of infection with a number of studies identifying genotypically indistinguishable strains in the  
69 natural environment and the respiratory tract of CF patients (3, 19-22). However antibiotic  
70 susceptibility of isolates from natural (non-man-made) environmental sources has had very  
71 limited studies and so it is not clear whether the natural environment provides a reservoir of  
72 antibiotic-resistant *P. aeruginosa* (7, 23, 24). Using a cohort of clinical isolates as a  
73 comparator, here we determined the prevalence of antibiotic resistance in *P. aeruginosa* from  
74 the natural environment (river), the domestic and community settings (swimming pool and  
75 water tank) by assessing antimicrobial susceptibility profiles and allelic variations in resistance  
76 genes of *P. aeruginosa*.

77

## 78 **Materials and Methods**

### 79 **Isolate Selection and identification**

80 Fifty environmental *P. aeruginosa* isolates obtained from water sources in Queensland,  
81 Australia and 42 clinical *P. aeruginosa* isolates obtained from CF patients residing in Australia  
82 and New Zealand were examined (Supplementary Table 1). Environmental isolates included  
83 those obtained from rivers (n=36), swimming pools (n=13) and one sample from a domestic  
84 water tank. Individual multi-locus sequence types (MLST) were present in singleton isolates,  
85 except for sequence types (ST) -155, -179, -266 and -381 which were represented once each in  
86 both the CF and environmental isolate cohorts. Isolate identification and MLST typing were  
87 confirmed using molecular techniques (<https://pubmlst.org/paeruginosa/>) (25-27).

## 88 **Antimicrobial Susceptibility Testing**

89 The minimum inhibitory concentration (MIC) of ciprofloxacin, meropenem, tobramycin and  
90 ceftazidime was determined for all the 92 isolates using ETEST® strips and methodology. The  
91 breakpoint was determined according to the Clinical and Laboratory Standards Institute (CLSI)  
92 guidelines (<https://clsi.org/>).

## 93 **Whole genome sequencing and bioinformatic analysis**

94 DNA was extracted from each strain using the MoBio UltraClean® Microbial DNA isolation  
95 kit in accordance with the manufacturer's instructions. Isolates were sequenced to ~50-fold  
96 (50x) coverage using illumina MiSeq, 2x150, or 2x300 basepair (bp) paired-end reads. Raw  
97 sequence reads were trimmed using Trimmomatic version 0.36 (28). Draft genomes were  
98 assembled using SPAdes version 3.12.0 as described previously (29).

## 99 **Resistance Gene Analysis**

100 Genome assemblies were used for the comparison of 25 well characterised genes associated  
101 with antibiotic resistance, with reference sequences sourced from  
102 <https://www.pseudomonas.com> (Supplementary Table 2). Protein Variation Effect Analyzer  
103 (PROVEAN) version 1.1 was utilised to identify and analyse genetic variants within the chosen  
104 genes (30). Genetic variants (amino acid substitutions) were categorised in accordance to  
105 PROVEAN scores, as predicted function-altering variants (PROVEAN score:  $\leq -2.5$ ) or  
106 variants not predicted to affect function (PROVEAN score:  $> -2.5$ ). Additionally, each genome  
107 was manually screened using tblastn for premature stop codons and deletions which were also  
108 classified as function-altering variants (31).

109 ResFinder version 3.1 was used with a prebuilt ResFinder database, including all relevant  
110 antibiotics, to determine whether resistance could be affected by acquired genes  
111 (<https://cge.cbs.dtu.dk/services/ResFinder/>).

## 112 **Statistical analysis**

113 SPSS version 25 was used for statistical analysis. Pearson's chi-square test was used to  
114 examine the association between niche and phenotype (susceptible or resistant) and niche and  
115 genotype. When more than 20% of the expected values were less than five, Fisher's exact test  
116 were used. A  $P$ -value of  $<0.05$  was considered significant.

117

## 118 **Results and Discussion**

119 A total of 50 isolates of *P. aeruginosa* from the natural environment and 42 isolates from  
120 patients with CF were included in this study. The isolates are genetically diverse and broadly  
121 representative of the *P. aeruginosa* species (Supplementary Figure S1).

### 122 **Environmental isolates are antibiotic susceptible**

123 All 50 environmental isolates were susceptible to ciprofloxacin, meropenem and tobramycin  
124 and only one of these isolates was resistant to ceftazidime (Figure 1, Supplementary Table 3).  
125 Conversely, a non-susceptible (intermediate or resistant) phenotype was observed for 15 of the  
126 42 CF isolates. Specifically, 10%, 17% 19% and 21% of the CF isolates were non-susceptible  
127 to tobramycin, meropenem, ceftazidime and ciprofloxacin, respectively (Figure 1,  
128 Supplementary Table 4). Overall, the frequency of resistant isolates was significantly less in  
129 the environmental cohort than the CF cohort (ceftazidime  $P=0.010$ , ciprofloxacin  $P=0.001$ ,  
130 meropenem  $P=0.003$ , tobramycin  $P=0.040$ ). Due to limited availability of clinical information  
131 we were unable to characterise CF infections as either early/transient or chronic to assess  
132 whether resistance is more prevalent in chronically infected patients. However, when we  
133 categorised the CF isolates according to patient age (adult  $\geq 18$  years; adult  $n=29$ , paediatric  
134  $n=13$ ), isolates from two paediatric patients (15.4%) demonstrated antibiotic resistance  
135 compared with isolates from 13 adults (44.8%) ( $P=0.066$ ) (Figure 1). Overall our findings are  
136 in agreement with a model of bacterial adaptation during infection leading to increased  
137 resistance over time (32). Our results demonstrate that environmental isolates are susceptible

138 to clinically relevant antibiotics and that the environments we tested are not a reservoir for  
139 antibiotic resistant isolates.

140 **Environmental isolates have fewer predicted function-altering variants in resistance-**  
141 **associated genes**

142 We analysed 25 well characterised resistance-associated genes for the presence of likely  
143 function-altering variants that could influence antibiotic susceptibility (Supplementary Table  
144 2). The environmental isolates had strikingly fewer predicted function-altering variants than  
145 the CF isolates. A total of 75 predicted function-altering variants were identified within 18 of  
146 25 resistance genes analysed for the 50 environmental isolates. No predicted function-altering  
147 variants were identified in the remaining seven genes (Supplementary Table 3). In this cohort,  
148 the predicted function-altering variants are generally not sufficient to confer antibiotic  
149 resistance as all except one isolate was fully susceptible to the antibiotics tested. In contrast,  
150 110 predicted function-altering variants affecting all 25 resistance-associated genes were  
151 identified in the 42 CF isolates. Function-altering variants not analysed by PROVEAN,  
152 including premature stop-codons and deletions, were absent in the environmental cohort but  
153 were present in nine CF isolates (premature stop-codons n=8, deletions n=2) (Supplementary  
154 Table 4). Overall, variants in the environmental cohort had a significantly higher PROVEAN  
155 score than those in the CF cohort ( $P<0.001$ ), indicating the presence of fewer amino acid  
156 substitutions that may affect function of resistance-associated proteins (Supplementary Figure  
157 2).

158 The frequency of function-altering variants within each gene was determined for both cohorts  
159 of isolates (Table 1). Statistical differences were noted for 6 genes in the CF cohort with a  
160 greater number of function-altering variants being present in *amgS* and *fusA1* (tobramycin  
161 resistance), *gyrA* and *gyrB* (ciprofloxacin resistance) and *mexZ* (broad-spectrum resistance)  
162 genes for isolates in the CF cohort, and in *ampE* ( $\beta$ -lactam resistance) for the natural

163 environmental isolates (Table 1). Specific variants present in these genes, such as T83I (*gyrA*),  
164 and R504C (*ftsI*) previously associated with resistance were only present in the CF isolate  
165 cohort only (33, 34). However, a strong association between individual gene variants and  
166 resistance phenotype was not observed (Supplementary Table 4) due to the low numbers of  
167 isolates with variants for each gene combined with the multifactorial nature of antibiotic  
168 resistance in *P. aeruginosa*.

169 ResFinder analysis assessing the presence of horizontally acquired resistance genes identified  
170 a gene *crpP* associated with fluoroquinolone resistance (35). However there was no correlation  
171 between ciprofloxacin resistance and the presence of *crpP* for the isolates in this study  
172 (Supplementary Table 3 and 4). No other horizontally-transferred resistance genes were  
173 identified.

174 In conclusion, our findings show that isolates from *P. aeruginosa* from natural environments  
175 have low frequencies of antibiotic resistance, and of genetic variants associated with resistance,  
176 compared to isolates from patients with CF. These findings indicate that the natural  
177 environment is unlikely to act as a reservoir of antibiotic-resistant *P. aeruginosa*. They are  
178 consistent with a model in which patients are infected by antibiotic-sensitive *P. aeruginosa*  
179 from the environment which then evolves to become antibiotic-resistant during infection (32).

180

## 181 **Acknowledgements**

182 We would like to acknowledge and thank the individuals with cystic fibrosis for providing  
183 samples. We thank the members of the CF healthcare teams at The Prince Charles Hospital,  
184 Lady Cilento Children's Hospital, Royal Hobart Hospital, Royal Children's Hospital,  
185 Melbourne and Westmead Children's Hospital, Australia and Dunedin Public Hospital, New  
186 Zealand and the staff of the various microbiology departments for their ongoing support of  
187 research. We thank Dr Timothy Kidd, Professor Claire Wainwright and Professor Keith



188 Grimwood for access to the Australian isolate collection. We thank Professor Roger Lévesque  
189 and colleagues at the Institute of Integrative Biology and Systems at Université Laval, Québec  
190 for carrying out whole genome sequencing of isolates analysed in this study.

191

## 192 **Funding**

193 This work was supported by The Health Research Council of New Zealand (grant 17/372)  
194 (K.A.R, W.M.P and I.L.L) a University of Otago Doctoral Scholarship (S.J.T-W), Australian  
195 National Health and Medical Research Council Project (grant 455919), The Prince Charles  
196 Hospital Foundation and Queensland Health HRF (S.C.B). WMP gratefully acknowledges  
197 receipt of funding from the Wellington Medical Research Foundation and the Maurice and  
198 Phyllis Paykel Trust.

199

## 200 **Transparency declarations**

201 K.A.R, S.J.T-W, W.M.P, B.B, D.W.R and I.L.L have nothing to declare. S.C.B is a Member  
202 of Advisory Board, Member of Writing group, Site Principle Investigator, author on several  
203 Rempex sponsored studies, a member of advisory boards for Vertex, Abbvie and Galapagos  
204 and has received support to attend meetings including advisory boards and investigator  
205 meetings. CW was a member of a Chiesi Limited CF Microbiology Advisory Board (12  
206 September 2018).

207

208 Table 1: Comparison of predicted function altering variants identified in the CF and  
 209 environmental isolates (n = 92).

| Gene            | Predicted function altering variants <sup>§</sup> |              | P-value <sup>†</sup> |
|-----------------|---------------------------------------------------|--------------|----------------------|
|                 | Environment<br>(n=50)                             | CF<br>(n=42) |                      |
| <i>amgR</i>     | 0                                                 | 1            | 0.457*               |
| <i>amgS</i>     | 0                                                 | 5            | 0.017*               |
| <i>ampC</i>     | 15                                                | 17           | 0.293                |
| <i>ampD</i>     | 9                                                 | 5            | 0.418                |
| <i>ampDh2</i>   | 1                                                 | 3            | 0.328*               |
| <i>ampDh3</i>   | 6                                                 | 6            | 0.746                |
| <i>ampE</i>     | 14                                                | 4            | 0.026                |
| <i>ampG</i>     | 0                                                 | 1            | 0.457*               |
| <i>ampR</i>     | 7                                                 | 3            | 0.336*               |
| <i>aph3'IIb</i> | 19                                                | 19           | 0.204                |
| <i>ftsI</i>     | 1                                                 | 5            | 0.089*               |
| <i>fusA1</i>    | 0                                                 | 16           | <0.001               |
| <i>galU</i>     | 0                                                 | 1            | 0.457*               |
| <i>gyrA</i>     | 1                                                 | 10           | 0.001                |
| <i>gyrB</i>     | 0                                                 | 6            | 0.007*               |
| <i>mexR</i>     | 1                                                 | 1            | 1.00*                |
| <i>mexZ</i>     | 1                                                 | 14           | <0.001               |
| <i>mpl</i>      | 1                                                 | 4            | 0.174*               |
| <i>nalC</i>     | 1                                                 | 3            | 0.328*               |
| <i>nalD</i>     | 0                                                 | 3            | 0.091*               |
| <i>nfxB</i>     | 3                                                 | 5            | 0.462*               |
| <i>nuoG</i>     | 3                                                 | 2            | 1.00*                |
| <i>oprD</i>     | 41                                                | 36           | 0.631                |
| <i>parC</i>     | 1                                                 | 1            | 1.00*                |
| <i>parE</i>     | 2                                                 | 3            | 0.657*               |

210 <sup>§</sup>PROVEAN predicted function-altering variants, premature stop codons and deletions.

211 <sup>†</sup>Chi-square value; \*Fisher's Exact Test used in place of chi-square test

212 P-value <0.05 is considered significant

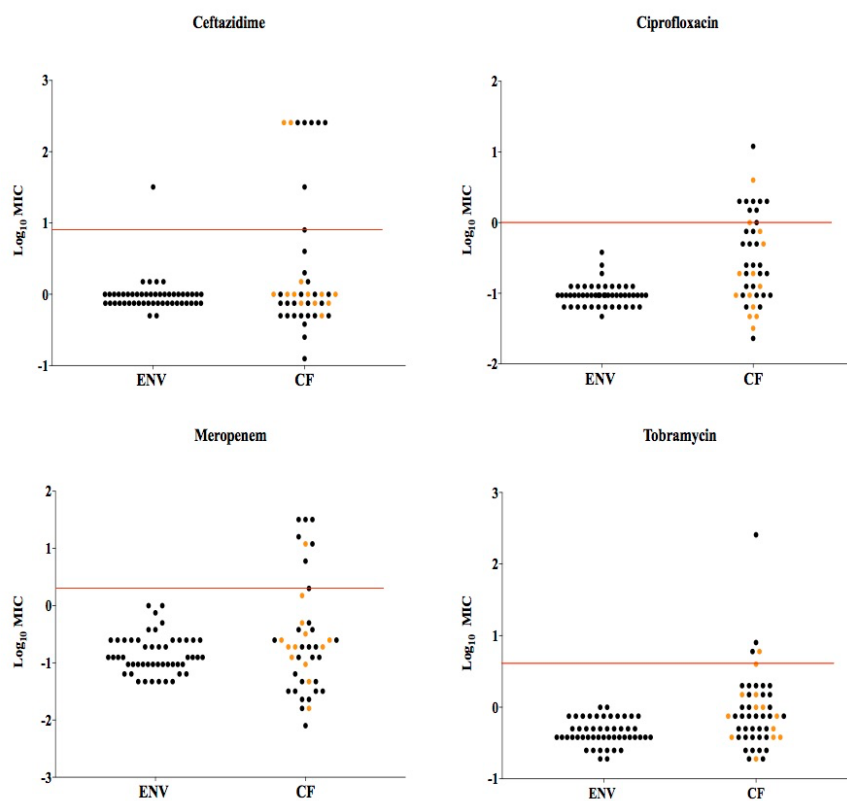

Figure 1: Distribution of antimicrobial susceptibility results of environmental (ENV; n=50) and cystic fibrosis (CF; n=42) isolates for ciprofloxacin, ceftazidime, meropenem and tobramycin. The horizontal red lines represent the antibiotic breakpoint as defined by the CLSI. The CF isolates have been further differentiated into samples collected from adult (black circles) and paediatric (orange circles) patients. The MIC results have been log transformed ( $\log_{10}$ ) for ease of graphical representation.

213

214

215

216 **References:**

- 217 1. Gellatly SL, Hancock RE. *Pseudomonas aeruginosa*: new insights into pathogenesis  
218 and host defenses. *Pathog Dis*. 2013;67(3):159-173. doi: 10.1111/2049-632x.12033
- 219 2. Decraene V, Ghebrehewet S, Dardamissis E, Huyton R, Mortimer K, Wilkinson D,  
220 Shokrollahi K, Singleton S, Patel B, Turton J, Hoffman P, Puleston R. An outbreak of  
221 multidrug-resistant *Pseudomonas aeruginosa* in a burns service in the North of England:  
222 challenges of infection prevention and control in a complex setting. *J Hosp Infect*. 2018. doi:  
223 10.1016/j.jhin.2018.07.012
- 224 3. Kidd TJ, Ritchie SR, Ramsay KA, Grimwood K, Bell SC, Rainey PB. *Pseudomonas*  
225 *aeruginosa* exhibits frequent recombination, but only a limited association between genotype  
226 and ecological setting. *PLoS One*. 2012;7(9):e44199. doi: 10.1371/journal.pone.0044199
- 227 4. Purdy-Gibson ME, France M, Hundley TC, Eid N, Remold SK. *Pseudomonas*  
228 *aeruginosa* in CF and non-CF homes is found predominantly in drains. *J Cyst Fibros*.  
229 2015;14(3):341-346. doi: 10.1016/j.jcf.2014.10.008
- 230 5. Elborn JS. Cystic fibrosis. *Lancet*. 2016;388(10059):2519-2531. doi: 10.1016/s0140-  
231 6736(16)00576-6
- 232 6. Lister PD, Wolter DJ, Hanson ND. Antibacterial-resistant *Pseudomonas aeruginosa*:  
233 clinical impact and complex regulation of chromosomally encoded resistance mechanisms.  
234 *Clin Microbiol Rev*. 2009;22(4):582-610. doi: 10.1128/cmr.00040-09
- 235 7. Bhuiya M, Sarkar MKI, Sohag MH, Ali H, Roy CK, Akther L, Sarker AF. Enumerating  
236 antibiotic susceptibility patterns of *Pseudomonas aeruginosa* isolated from different sources in  
237 Dhaka City. *Open Microbiol J*. 2018;12:172-180. doi: 10.2174/1874285801812010172
- 238 8. Devarajan N, Kohler T, Sivalingam P, van Delden C, Mulaji CK, Mpiana PT, Ibelings  
239 BW, Pote J. Antibiotic resistant *Pseudomonas* spp. in the aquatic environment: A prevalence

- 240 study under tropical and temperate climate conditions. *Water Res.* 2017;115:256-265. doi:  
241 10.1016/j.watres.2017.02.058
- 242 9. Ebrahimpour M, Nikokar I, Ghasemi Y, Sedigh Ebrahim-Saraie H, Araghian A,  
243 Farahbakhsh M, Ghassabi F. Antibiotic resistance and frequency of class 1 integrons among  
244 *Pseudomonas aeruginosa* isolates obtained from wastewaters of a burn center in Northern Iran.  
245 *Ann Ig.* 2018;30(2):112-119. doi: 10.7416/ai.2018.2202
- 246 10. Kummerer K. Antibiotics in the aquatic environment--a review--part II. *Chemosphere.*  
247 2009;75(4):435-441. doi: 10.1016/j.chemosphere.2008.12.006
- 248 11. Odumosu BT, Ajetunmobi O, Dada-Adegbola H, Odutayo I. Antibiotic susceptibility  
249 pattern and analysis of plasmid profiles of *Pseudomonas aeruginosa* from human, animal and  
250 plant sources. *Springerplus.* 2016;5(1):1381. doi: 10.1186/s40064-016-3073-9
- 251 12. Olga P, Apostolos V, Alexis G, George V, Athena M. Antibiotic resistance profiles of  
252 *Pseudomonas aeruginosa* isolated from various Greek aquatic environments. *FEMS Microbiol*  
253 *Ecol.* 2016;92(5):fiw042. doi: 10.1093/femsec/fiw042
- 254 13. Ruiz L, Dominguez MA, Ruiz N, Vinas M. Relationship between clinical and  
255 environmental isolates of *Pseudomonas aeruginosa* in a hospital setting. *Arch Med Res.*  
256 2004;35(3):251-257. doi: 10.1016/j.arcmed.2004.02.005
- 257 14. Spindler A, Otton LM, Fuentesfria DB, Corcao G. Beta-lactams resistance and presence  
258 of class 1 integron in *Pseudomonas* spp. isolated from untreated hospital effluents in Brazil.  
259 *Antonie Van Leeuwenhoek.* 2012;102(1):73-81. doi: 10.1007/s10482-012-9714-2
- 260 15. Tumeo E, Gbaguidi-Haore H, Patry I, Bertrand X, Thouverez M, Talon D. Are  
261 antibiotic-resistant *Pseudomonas aeruginosa* isolated from hospitalised patients recovered in  
262 the hospital effluents? *Int J Hyg Environ Health.* 2008;211(1-2):200-204. doi:  
263 10.1016/j.ijheh.2007.02.010

- 264 16. Walsh TR, Weeks J, Livermore DM, Toleman MA. Dissemination of NDM-1 positive  
265 bacteria in the New Delhi environment and its implications for human health: an environmental  
266 point prevalence study. *Lancet Infect Dis*. 2011;11(5):355-362. doi: 10.1016/s1473-  
267 3099(11)70059-7
- 268 17. Schiavano GF, Carloni E, Andreoni F, Magi S, Chironna M, Brandi G, Amagliani G.  
269 Prevalence and antibiotic resistance of *Pseudomonas aeruginosa* in water samples in central  
270 Italy and molecular characterization of *oprD* in imipenem resistant isolates. *PLoS One*.  
271 2017;12(12):e0189172. doi: 10.1371/journal.pone.0189172
- 272 18. Gad GF, El-Domany RA, Zaki S, Ashour HM. Characterization of *Pseudomonas*  
273 *aeruginosa* isolated from clinical and environmental samples in Minia, Egypt: prevalence,  
274 antibiogram and resistance mechanisms. *J Antimicrob Chemother*. 2007;60(5):1010-1017. doi:  
275 10.1093/jac/dkm348
- 276 19. Kidd TJ, Ramsay KA, Vidmar S, Carlin JB, Bell SC, Wainwright CE, Grimwood K.  
277 *Pseudomonas aeruginosa* genotypes acquired by children with cystic fibrosis by age 5-years.  
278 *J Cyst Fibros*. 2015;14(3):361-369. doi: 10.1016/j.jcf.2014.12.007
- 279 20. Ranganathan SC, Skoric B, Ramsay KA, Carzino R, Gibson AM, Hart E, Harrison J,  
280 Bell SC, Kidd TJ. Geographical differences in first acquisition of *Pseudomonas aeruginosa* in  
281 cystic fibrosis. *Ann Am Thorac Soc*. 2013;10(2):108-114. doi: 10.1513/AnnalsATS.201209-  
282 0770C
- 283 21. Rosenfeld M, Emerson J, McNamara S, Thompson V, Ramsey BW, Morgan W, Gibson  
284 RL. Risk factors for age at initial *Pseudomonas acquisition* in the cystic fibrosis epic  
285 observational cohort. *J Cyst Fibros*. 2012;11(5):446-453. doi: 10.1016/j.jcf.2012.04.003
- 286 22. Romling U, Wingender J, Muller H, Tummeler B. A major *Pseudomonas aeruginosa*  
287 clone common to patients and aquatic habitats. *Appl Environ Microbiol*. 1994;60(6):1734-  
288 1738. doi:

- 289 23. Kittinger C, Lipp M, Baumert R, Folli B, Koraimann G, Toplitsch D, Liebmann A,  
290 Grisold AJ, Farnleitner AH, Kirschner A, Zarfel G. Antibiotic Resistance Patterns of  
291 *Pseudomonas* spp. Isolated from the River Danube. *Front Microbiol.* 2016;7:586. doi:  
292 10.3389/fmicb.2016.00586
- 293 24. Liew SM, Rajasekaram G, Puthucheary SA, Chua KH. Antimicrobial susceptibility and  
294 virulence genes of clinical and environmental isolates of *Pseudomonas aeruginosa*. *PeerJ.*  
295 2019;7:e6217. doi: 10.7717/peerj.6217
- 296 25. Anuj SN, Whiley DM, Kidd TJ, Bell SC, Wainwright CE, Nissen MD, Sloots TP.  
297 Identification of *Pseudomonas aeruginosa* by a duplex real-time polymerase chain reaction  
298 assay targeting the *ecfX* and the *gyrB* genes. *Diagn Microbiol Infect Dis.* 2009;63(2):127-131.  
299 doi: 10.1016/j.diagmicrobio.2008.09.018
- 300 26. Jolley KA, Bray JE, Maiden MCJ. Open-access bacterial population genomics: BIGSdb  
301 software, the PubMLST.org website and their applications. *Wellcome Open Res.* 2018;3:124.  
302 doi: 10.12688/wellcomeopenres.14826.1
- 303 27. Matsuda K, Tsuji H, Asahara T, Kado Y, Nomoto K. Sensitive quantitative detection  
304 of commensal bacteria by rRNA-targeted reverse transcription-PCR. *Appl Environ Microbiol.*  
305 2007;73(1):32-39. doi: 10.1128/aem.01224-06
- 306 28. Bolger AM, Lohse M, Usadel B. Trimmomatic: a flexible trimmer for Illumina  
307 sequence data. *Bioinformatics.* 2014;30(15):2114-2120. doi: 10.1093/bioinformatics/btu170
- 308 29. Freschi L, Jeukens J, Kukavica-Ibrulj I, Boyle B, Dupont MJ, Laroche J, Larose S,  
309 Maaroufi H, Fothergill JL, Moore M, Winsor GL, Aaron SD, Barbeau J, Bell SC, Burns JL,  
310 Camara M, Cantin A, Charette SJ, Dewar K, Deziel E, Grimwood K, Hancock RE, Harrison  
311 JJ, Heeb S, Jelsbak L, Jia B, Kenna DT, Kidd TJ, Klockgether J, Lam JS, Lamont IL, Lewenza  
312 S, Loman N, Malouin F, Manos J, McArthur AG, McKeown J, Milot J, Naghra H, Nguyen D,  
313 Pereira SK, Perron GG, Pirnay JP, Rainey PB, Rousseau S, Santos PM, Stephenson A, Taylor

- 314 V, Turton JF, Waglechner N, Williams P, Thrane SW, Wright GD, Brinkman FS, Tucker NP,  
315 Tummler B, Winstanley C, Levesque RC. Clinical utilization of genomics data produced by  
316 the international *Pseudomonas aeruginosa* consortium. *Front Microbiol.* 2015;6:1036. doi:  
317 10.3389/fmicb.2015.01036
- 318 30. Choi Y, Sims GE, Murphy S, Miller JR, Chan AP. Predicting the functional effect of  
319 amino acid substitutions and indels. *PLoS One.* 2012;7(10):e46688. doi:  
320 10.1371/journal.pone.0046688
- 321 31. Camacho C, Coulouris G, Avagyan V, Ma N, Papadopoulos J, Bealer K, Madden TL.  
322 BLAST+: architecture and applications. *BMC Bioinformatics.* 2009;10:421. doi:  
323 10.1186/1471-2105-10-421
- 324 32. Sousa AM, Pereira MO. *Pseudomonas aeruginosa* diversification during infection  
325 development in cystic fibrosis lungs-a review. *Pathogens.* 2014;3(3):680-703. doi:  
326 10.3390/pathogens3030680
- 327 33. Lopez-Causape C, Cabot G, Del Barrio-Tofino E, Oliver A. The versatile mutational  
328 resistome of *Pseudomonas aeruginosa*. *Front Microbiol.* 2018;9:685. doi:  
329 10.3389/fmicb.2018.00685
- 330 34. Rehman A, Patrick WM, Lamont IL. Mechanisms of ciprofloxacin resistance in  
331 *Pseudomonas aeruginosa*: new approaches to an old problem. *J Med Microbiol.* 2019;68(1):1-  
332 10. doi: 10.1099/jmm.0.000873
- 333 35. Chavez-Jacobo VM, Hernandez-Ramirez KC, Romo-Rodriguez P, Perez-Gallardo RV,  
334 Campos-Garcia J, Gutierrez-Corona JF, Garcia-Merinos JP, Meza-Carmen V, Silva-Sanchez  
335 J, Ramirez-Diaz MI. CrpP Is a Novel Ciprofloxacin-Modifying Enzyme Encoded by the  
336 *Pseudomonas aeruginosa* pUM505 Plasmid. *Antimicrob Agents Chemother.* 2018;62(6). doi:  
337 10.1128/aac.02629-17
